# Supplementary material for: Protein Supplementation with Short Peptides Prevents Early Muscle Mass Loss after Roux-en-Y-Gastric Bypass
Source: MDPI journal article supplement (doi:10.3390/nu14235095), 2022-12-01
Supplement: s1 [file s1]

**Valoración organoléptica del suplemento nutricional (SPANISH)**

Cumplimiento del suplemento nutricional (batido)

☐ 0%      ☐ 25%      ☐ 50%      ☐ 75%      ☐ 100%

En caso de no haber cumplido el 100% de la toma indique el motivo de interrupción:

¿Le ha gustado el sabor del batido?

☐ Sí      ☐ No

¿Le ha gustado el olor del batido?

☐ Sí      ☐ No

¿Le ha gustado el color del batido?

☐ Sí      ☐ No

¿Le ha saciado el batido? (marca según el nivel de saciedad)

☐ No (0%)    ☐ Un poco (25%)    ☐ Normal (50%)    ☐ Bastante (75%)    ☐ Mucho (100%)

¿Ha tolerado el batido?

☐ Sí      ☐ No

¿Ha presentado algún efecto secundario?

☐ Sí      ☐ No

En caso afirmativo, marque los efectos secundarios:

- ☐ Vómitos
- ☐ Náuseas
- ☐ Mareos
- ☐ Dolor abdominal
- ☐ Diarrea

¿Qué cambiaría del producto nutricional?

**Organoleptic evaluation of the nutritional supplement (ENGLISH)**

Compliance with the nutritional supplement (shake)

☐ 0% ☐ 25% ☐ 50% ☐ 75% ☐ 100%

If you have not completed 100% of the intake, indicate the reason for interruption:

Did you like the taste of the smoothie?

☐ Yes ☐ No

Did you like the smell of the smoothie?

☐ Yes ☐ No

Did you like the colour of the smoothie?

☐ Yes ☐ No

Has the milkshake filled you up? (mark according to the level of satiety)

☐ No (0%) ☐ A little (25%) ☐ Normal (50%) ☐ Quite a bit (75%) ☐ A lot (100%)

Have you tolerated the shake?

☐ Yes ☐ No

Have you had any side effects?

☐ Yes ☐ No

If yes, please check the side effects:

- ☐ Vomiting
- ☐ Nausea
- ☐ Dizziness
- ☐ Abdominal pain
- ☐ Diarrhea

What would change the nutritional product?
